# Supplementary material for: Microbiota-induced active translocation of peptidoglycan across the intestinal barrier dictates its within-host dissemination
Source: PubMed Central journal article supplement — Proc Natl Acad Sci U S A. 2023 Jan 20;120(4):e2209936120. doi: 10.1073/pnas.2209936120 (PMC9942837; doi:10.1073/pnas.2209936120), 2023-01-20
Supplement: pnas.2209936120.sapp.pdf [file pnas.2209936120.sapp.pdf]

1  
2  
3  
4  
5  
6  
7  
8  
9  
10  
11  
12  
13  
14  
15  
16  
17  
18  
19  
20  
21  
22  
23

**Supplementary Information for  
Microbiota-induced active translocation of peptidoglycan across the  
intestinal barrier dictates its within-host dissemination**

Richard Wheeler<sup>1#</sup>, Paulo André Dias Bastos<sup>1#</sup>, Olivier Disson<sup>2§</sup>, Aline Rifflet<sup>1§</sup>, Ilana Gabanyi<sup>3,4</sup>,  
Julia Spielbauer<sup>1</sup>, Marion Bérard<sup>5</sup>, Marc Lecuit<sup>2,6,7</sup>, Ivo Gomperts Boneca<sup>1\*</sup>

**Corresponding author(s):** Ivo Gomperts Boneca, Richard Wheeler

Email: bonecai@pasteur.fr, wheelerrsci@gmail.com

**This PDF file includes:**

- Figures S1 to S8
- Tables S1
- SI References

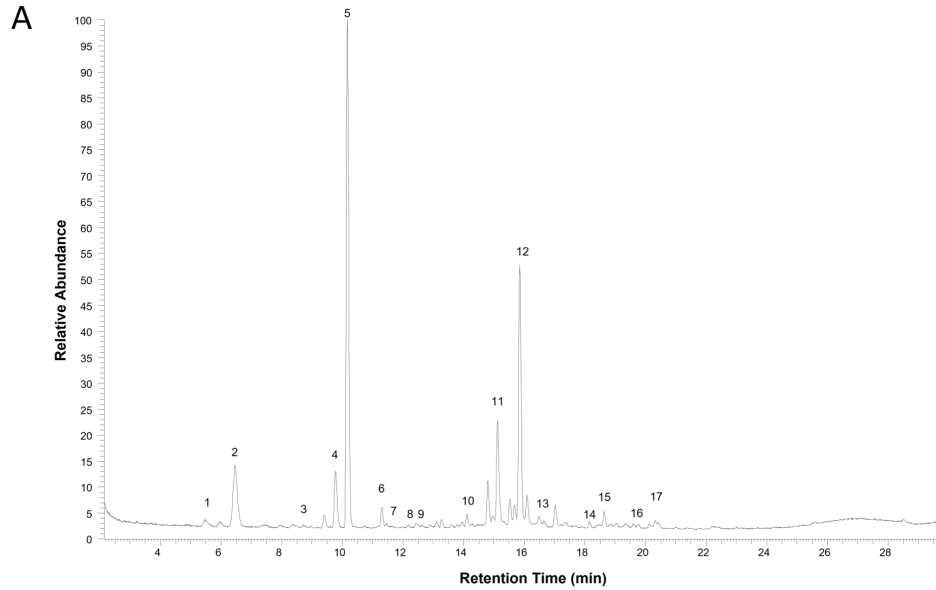

**B**

| # peak | Muropeptide        | Muropeptide Sequence                 | RT (min) | Formula        | m/z observed | m/z theoretical | z | error ppm |
|--------|--------------------|--------------------------------------|----------|----------------|--------------|-----------------|---|-----------|
| 1      | GM3H               | GM-AEmDapH                           | 5,47     | C40H65N9O21    | 504,7227     | 504,7220        | 2 | 1,39      |
| 2      | GM3                | GM-AEmDap                            | 6,46     | C34H58N6O20    | 436,1928     | 436,1926        | 2 | 0,46      |
| 3      | GM4 (deAc GlcN)    | GM-AEmDapA (deAc GlcN)               | 8,72     | C35H61N7O20    | 450,7065     | 450,7059        | 2 | 1,33      |
| 4      | GM2                | GM-AE                                | 9,82     | C27H46N4O17    | 699,2932     | 699,2931        | 1 | 0,14      |
| 5      | GM4                | GM-AEmDapA                           | 10,16    | C37H63N7O21    | 471,7108     | 471,7111        | 2 | -0,64     |
| 6      | GM-GM4 (deAc GlcN) | GM-GM-AEmDapA (deAc GlcN)            | 11,28    | C54H91N9O32    | 689,7962     | 689,7958        | 2 | 0,58      |
| 7      | GM5                | GM-AEmDapAA                          | 11,44    | C40H68N8O22    | 507,2308     | 507,2297        | 2 | 2,17      |
| 8      | GM4-mDAPEA         | GM-AEmDapA-mDapEA                    | 12,18    | C52H87N11O28   | 657,7946     | 657,7934        | 2 | 1,82      |
| 9      | GM4-AmDAPEA        | GM-AEmDapA-AmDapEA                   | 12,43    | C55H92N12O29   | 693,3129     | 693,3119        | 2 | 1,44      |
| 10     | GM3-GM3            | GM-AEmDap - GM-AEmDap                | 14,12    | C68H114N12O39  | 862,3743     | 862,3726        | 2 | 1,97      |
| 11     | GM3-GM4            | GM-AEmDap - GM-AEmDapA               | 15,12    | C71H119N13O40  | 897,8924     | 897,8911        | 2 | 1,45      |
| 12     | GM4-GM4            | GM-AEmDapA - GM-AEmDapA              | 15,86    | C74H124N14O41  | 933,4109     | 933,4097        | 2 | 1,29      |
| 13     | GanhM4             | GanhM-AEmDapA                        | 16,50    | C37H59N7O20    | 922,3901     | 922,3888        | 1 | 1,41      |
| 14     | GM3-GM4-GM4        | GM-AEmDap - GM-AEmDapA - GM-AEmDapA  | 18,15    | C108H180N20O60 | 906,7312     | 906,7289        | 3 | 2,54      |
| 15     | GM4-GM4-GM4        | GM-AEmDapA - GM-AEmDapA - GM-AEmDapA | 18,65    | C111H185N21O61 | 930,4108     | 930,4079        | 3 | 3,12      |
| 16     | GanhM3-GanhM4      | GanhM-AEmDap - GanhM-AEmDapA         | 19,60    | C71H115N13O39  | 887,8800     | 887,8780        | 2 | 2,25      |
| 17     | GanhM4-GM4         | GanhM-AEmDapA - GM-AEmDapA           | 20,33    | C74H120N14O40  | 923,3984     | 923,3966        | 2 | 1,95      |

24

25 **Fig. S1. Relative abundance of *E. coli* muropeptides** A) UHPLC profile indicating the relative  
 26 abundance of muropeptides from a typical *Escherichia coli* peptidoglycan preparation. Numbered  
 27 peaks are identified in the table below. B) Summary table of muropeptides identified by mass  
 28 spectrometry. G, *N*-acetyl-glucosamine; M, *N*-acetyl-muramitol (reduced form of *N*-acetyl-muramic  
 29 acid); anhM, 1,6-anhydro-*N*-acetylmuramic acid; 2-5, peptide stem length; A, alanine; E,  
 30 isoglutamate; mDap, meso-diaminopimelic acid; H, histidine; deAc GlcN, *N*-deacetylated  
 31 glucosamine.

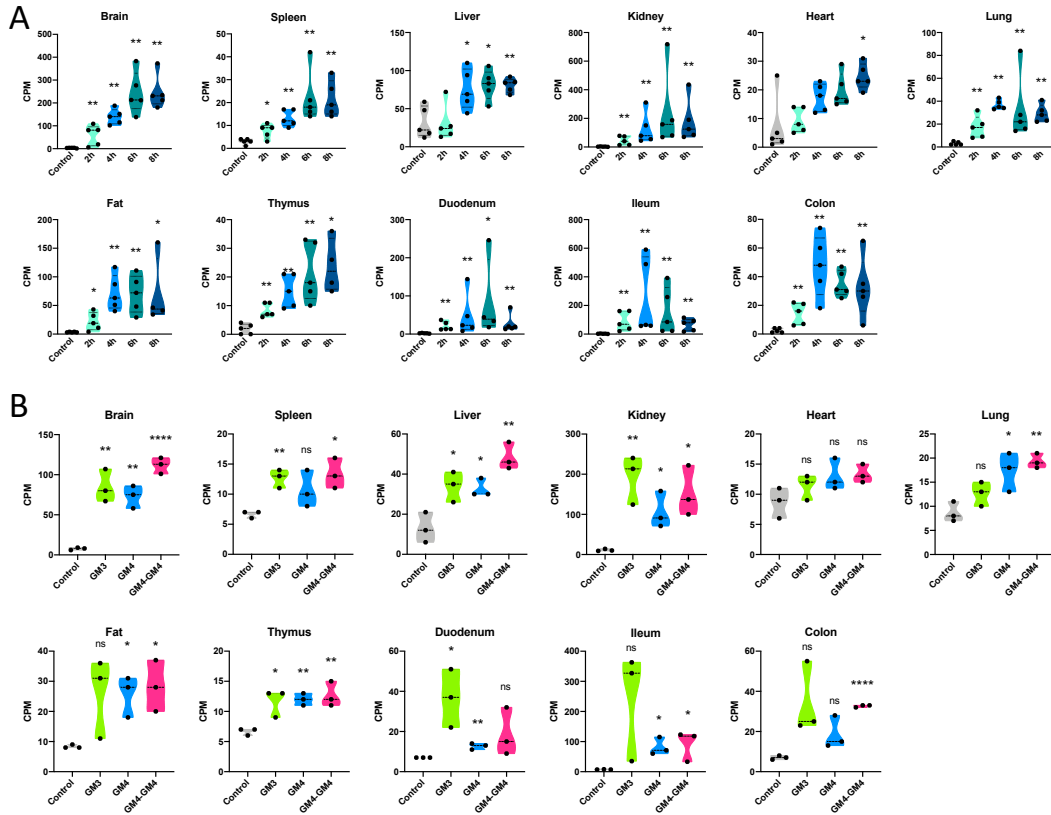

32

33 **Fig. S2. The kinetics of [3H]-PGN biodistribution following per os administration in mice.** A)   
 34 [3H]-PGN measured by scintillation counting of dissolved, decolorized organs and blood between 2h   
 35 and 8 h post-gavage. Data are presented as CPM per whole organ, or per tissue fragment   
 36 (duodenum, ileum, colon). Welch's ANOVA comparing time-point groups, excluding control: Brain   
 37  $P = 0.0564$ ; Spleen  $P = 0.5902$ ; Liver  $P = 0.0895$ ; Kidney  $P = 0.2958$ ; Heart  $P = 0.5178$ ; Lung  $P =$    
 38  $0.0656$ ; Fat  $P = 0.9250$ ; Duodenum  $P = 0.1740$ ; Ileum  $P = 0.4658$ ; Colon  $P = 0.1766$ . Pairwise   
 39 comparisons to control performed using the Mann–Whitney U test. \*  $P \leq 0.05$ ; \*\*  $P \leq 0.005$ ; \*\*\*  $P \leq$    
 40  $0.0005$ . B) The biodistribution of [3H]-GM3, [3H]-GM4 and [3H]-GM4-GM4, administered per os in   
 41 SPF mice. Data are presented as CPM per whole organ, or per tissue fragment. Pairwise   
 42 comparison with control performed using unpaired t-test. \*  $P \leq 0.05$ ; \*\*  $P \leq 0.0050$ ; \*\*\*  $P \leq 0.0005$ ;   
 43  $P < 0.0001$ . Welch's ANOVA comparing mucopeptides groups, excluding control: Brain  $P = 0.0564$ ;   
 44 Spleen  $P = 0.5902$ ; Liver  $P = 0.0895$ ; Kidney  $P = 0.2958$ ; Heart  $P = 0.7861$ ; Lung  $P = 0.0656$ ; Fat   
 45  $P = 0.0925$ ; Thymus  $P = 0.8678$ ; Duodenum  $P = 0.1740$ ; Ileum  $P = 0.4658$ ; Colon  $P = 0.1766$ .

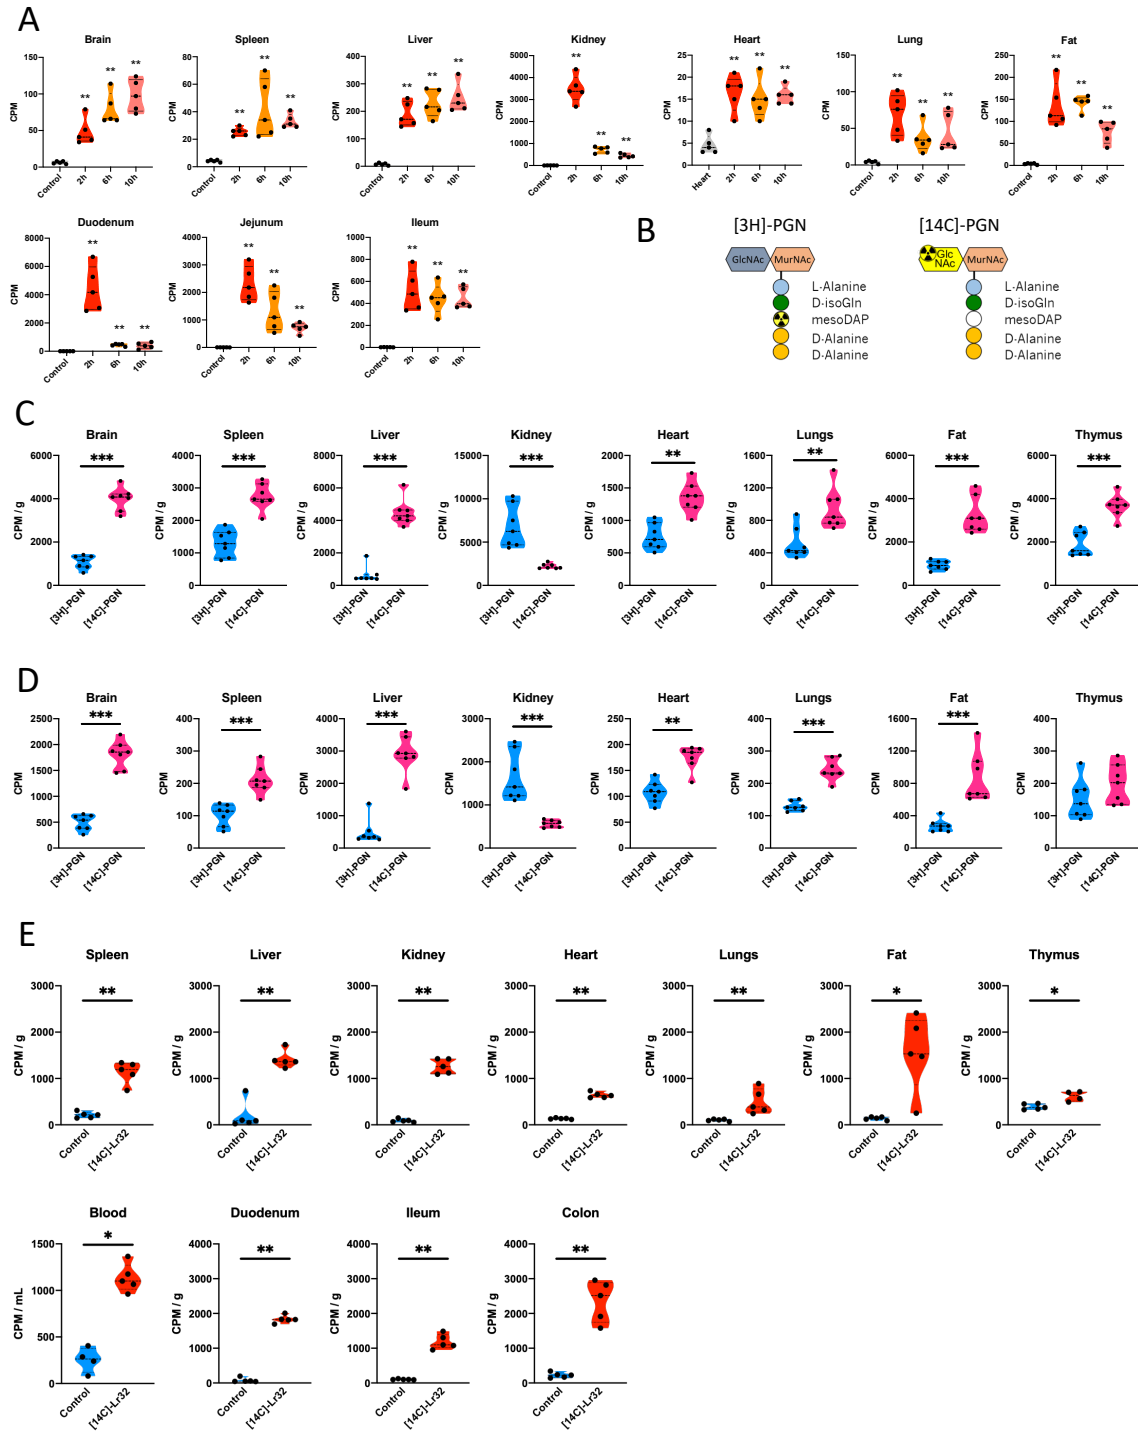

46

47 **Fig. S3. Effect of labelling strategy parameters on biodistribution of peptidoglycan.** A)  
 48 Biodistribution of [<sup>3</sup>H]-mesoDAP amino acid administered to mice *per os*. [<sup>3</sup>H]-mesoDAP  
 49 biodistribution was measured by scintillation counting of dissolved, decolorized organs, 2h, 6h and  
 50 10 h post-gavage. Data are presented as CPM per whole organ or tissue fragment. Welch's  
 51 ANOVA comparing time-point groups, excluding control: Brain  $P = 0.0159$ ; Spleen  $P = 0.0529$ ;  
 52 Liver  $P = 0.2269$ ; Kidney  $P < 0.0001$ ; Heart  $P = 0.8868$ ; Lung  $P = 0.1827$ ; Fat  $P = 0.0066$ ;  
 53 Duodenum  $P = 0.0054$ ; Jejunum  $P = 0.0056$ ; Ileum  $P = 0.7670$ . B) Schematic summary of

54 radiolabeling methodology, indicating the position of the 3H-labelled mesoDAP and 14C-labelled  
55 GlcNAc. C) Biodistribution of [<sup>3</sup>H]-PGN versus [<sup>14</sup>C]-PGN administered to mice *per os*. Mice were  
56 gavaged with 400,000 cpm of [<sup>3</sup>H]-PGN or [<sup>14</sup>C]-PGN and scintillation counting performed on  
57 dissolved, decolorized organs 4h post gavage. Data normalized as CPM values per g tissue weight.  
58 D) [<sup>3</sup>H]-PGN or [<sup>14</sup>C]-PGN biodistribution data presented as CPM per whole organ, or per tissue  
59 fragment without normalization. E) Biodistribution of [<sup>14</sup>C]-PGN from *L. rhamnosus* Lr32, 4h after  
60 administration to mice *per os*. Data normalized as CPM values per g tissue weight. Pairwise  
61 comparison to control performed using the Mann–Whitney U test. \*  $P \leq 0.05$ ; \*\*  $P \leq 0.005$ ; \*\*\*  $P \leq$   
62 0.0005.

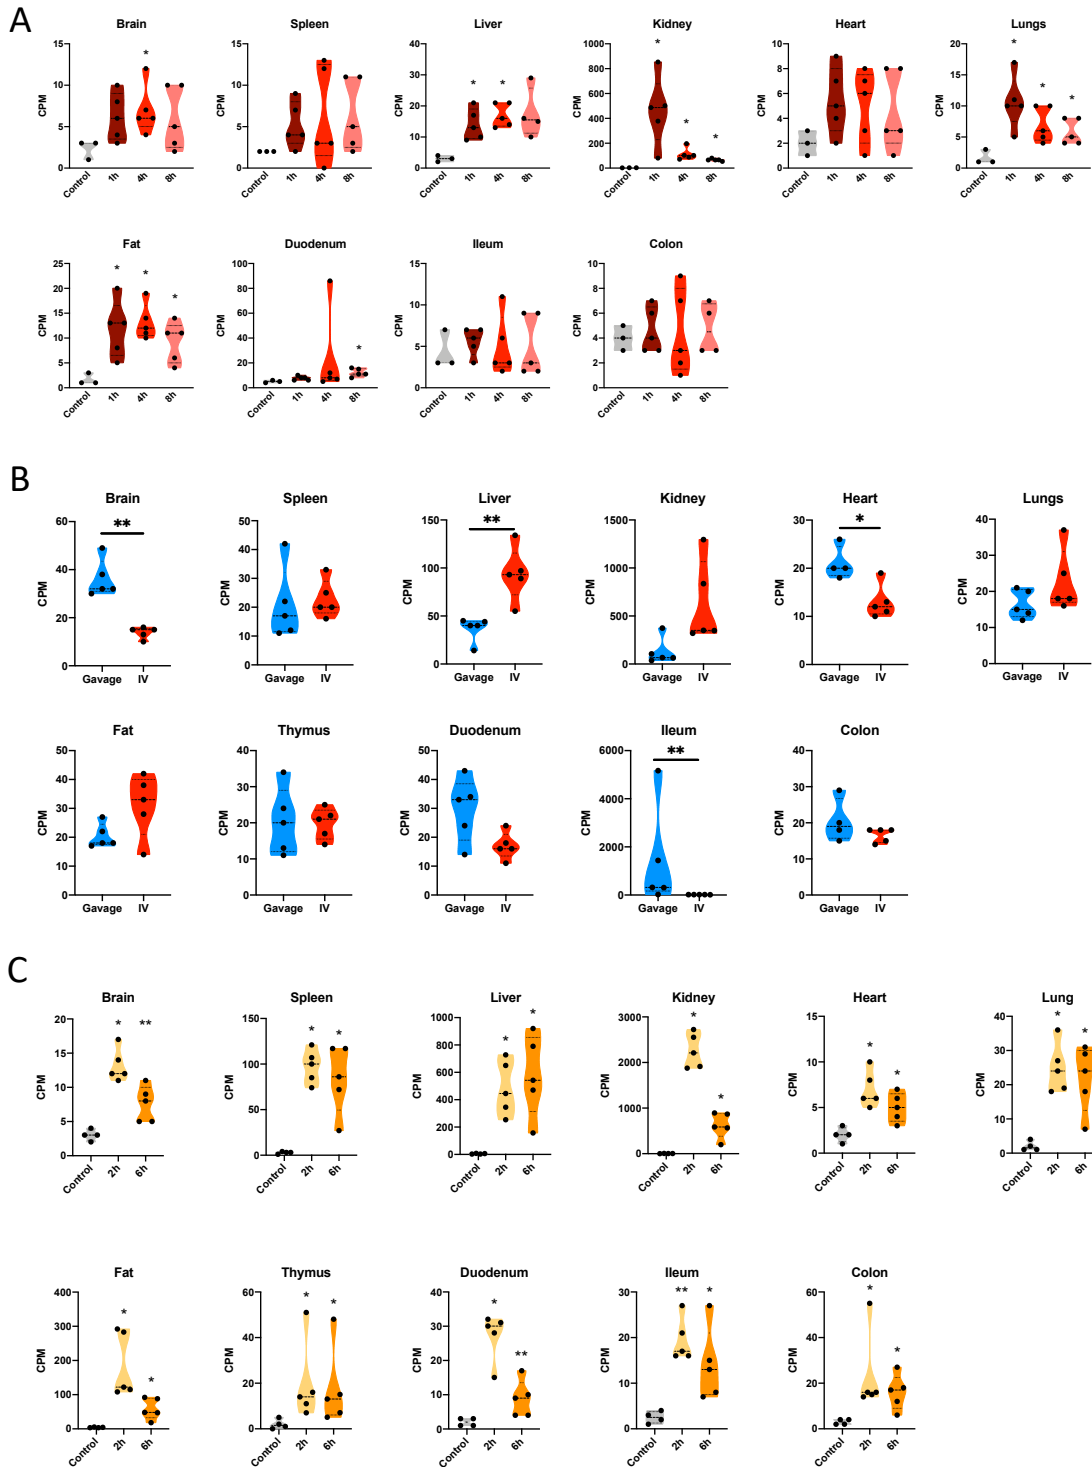

63

64 **Fig. S4. Biodistribution of different doses of  $[^3\text{H}]$ -PGN following intravenous or**  
 65 **intraperitoneal administration, without tissue weight normalization. A) Mice were**  
 66 **administered 40,000 CPM of  $[^3\text{H}]$ -PGN intravenously and biodistribution to organs and tissues**  
 67 **measured at 1h, 4h, 8h and 24h post-injection. Welch's ANOVA comparing time-point groups,**  
 68 **excluding control: Brain  $P = 0.8823$ ; Spleen  $P = 0.8644$ ; Liver  $P = 0.5885$ ; Kidney  $P < 0.0370$ ; Heart**

69  $P = 0.9196$ ; Lung  $P = 0.1599$ ; Fat  $P = 0.3361$ ; Duodenum  $P = 0.0758$ ; Ileum  $P = 0.9186$ ; Colon  $P$   
70  $= 0.9833$ . B) Comparison of [ $^3\text{H}$ ]-PGN distribution administered intravenously versus gavage. Mice  
71 were administered 400,000 CPM of [ $^3\text{H}$ ]-PGN intravenously or by gavage, and biodistribution to  
72 organs and tissues assessed at 1h (intravenous) or 4h (gavage). C) Biodistribution of [ $^3\text{H}$ ]-PGN  
73 administered intraperitoneally. Mice were injected intraperitoneally with 400,000 CPM of [ $^3\text{H}$ ]-PGN  
74 and by scintillation counting performed on the dissolved, decolorized organs harvested at 2h and 6h  
75 post-gavage. Pairwise comparison with between time-points performed using the Mann–Whitney  
76 U test, Brain  $P = 0.0159$ ; Spleen  $P = 0.6508$ ; Liver  $P = 0.5476$ ; Kidney  $P = 0.0079$ ; Heart  $P =$   
77  $0.1667$ ; Lung  $P = 0.8095$ ; Fat  $P = 0.0079$ ; Duodenum  $P = 0.0159$ ; Ileum  $P = 0.1190$ ; Colon  $P =$   
78  $0.9365$ . Pairwise comparison to control performed using the Mann–Whitney U test. \*  $P \leq 0.05$ ; \*\*  $P$   
79  $\leq 0.005$ ; \*\*\*  $P \leq 0.0005$ .

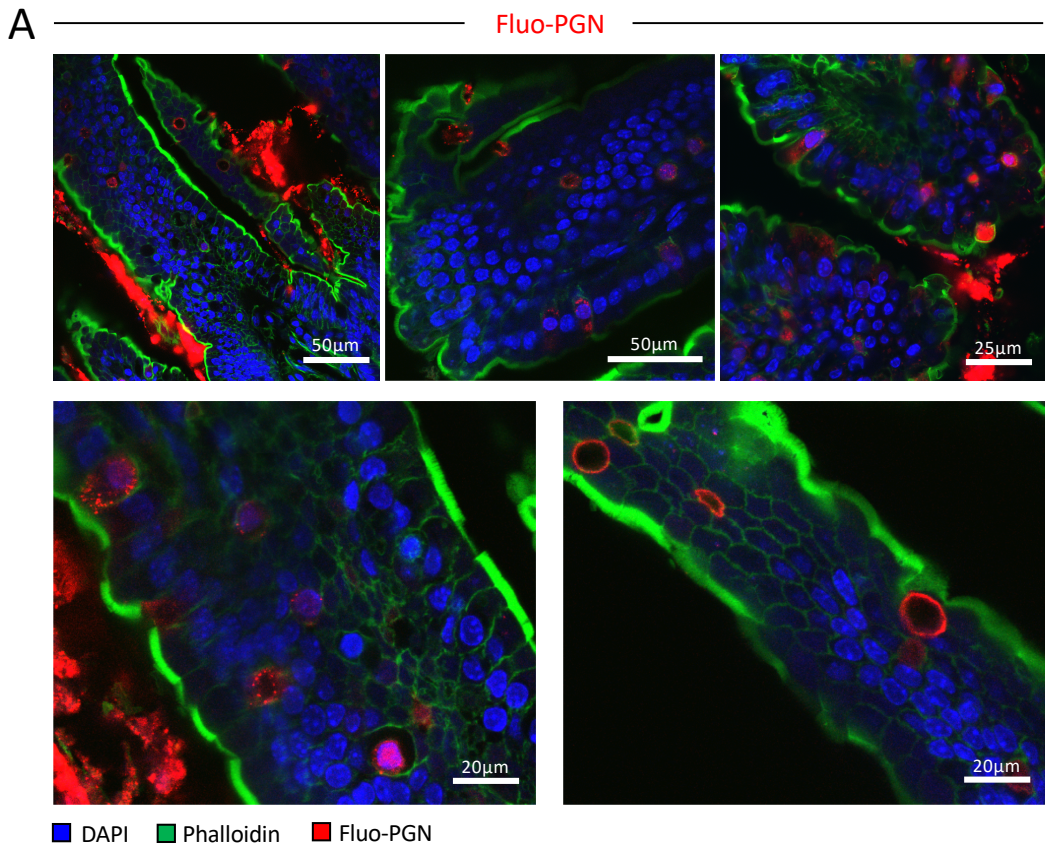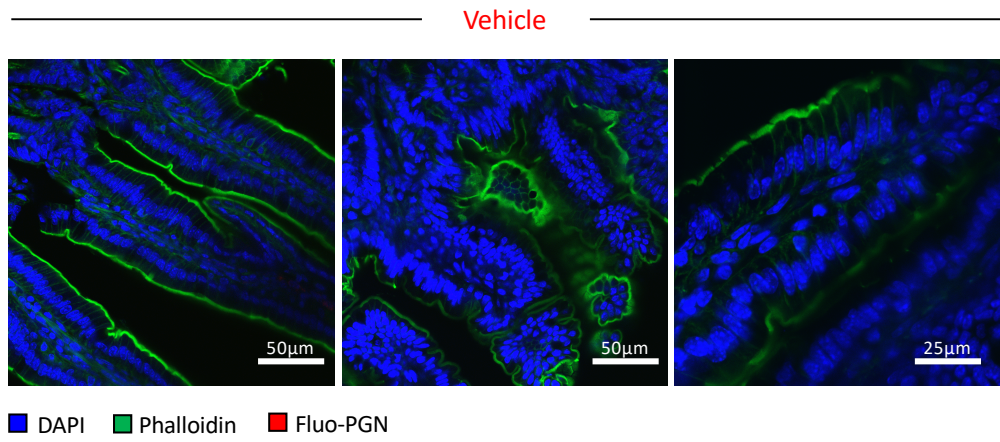



B

Fluo-PGN

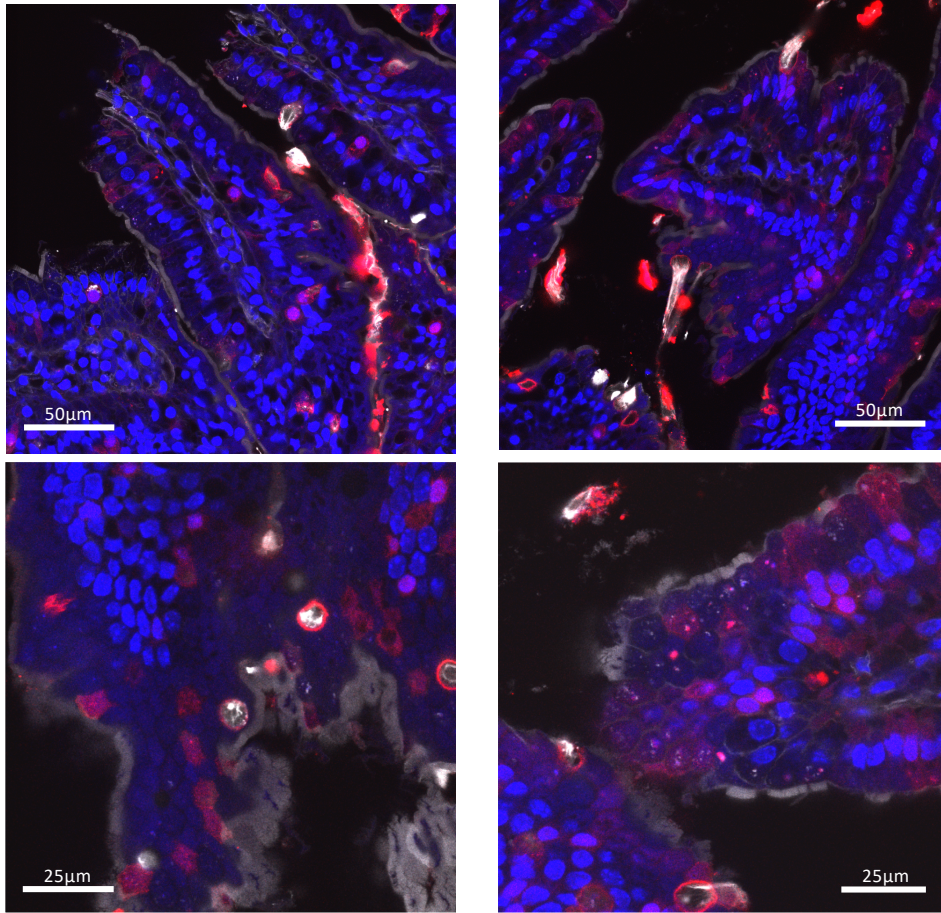

■ DAPI ■ Fluo-PGN □ WGA

Vehicle

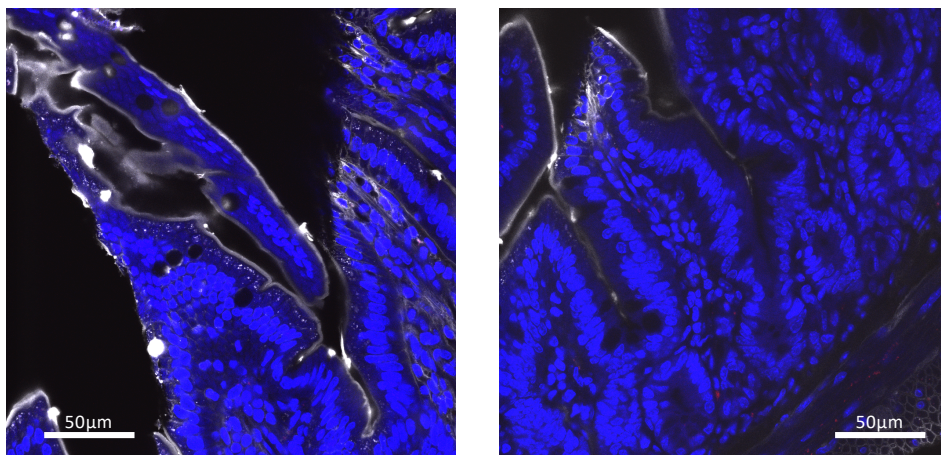

■ DAPI ■ Fluo-PGN □ WGA

81

82

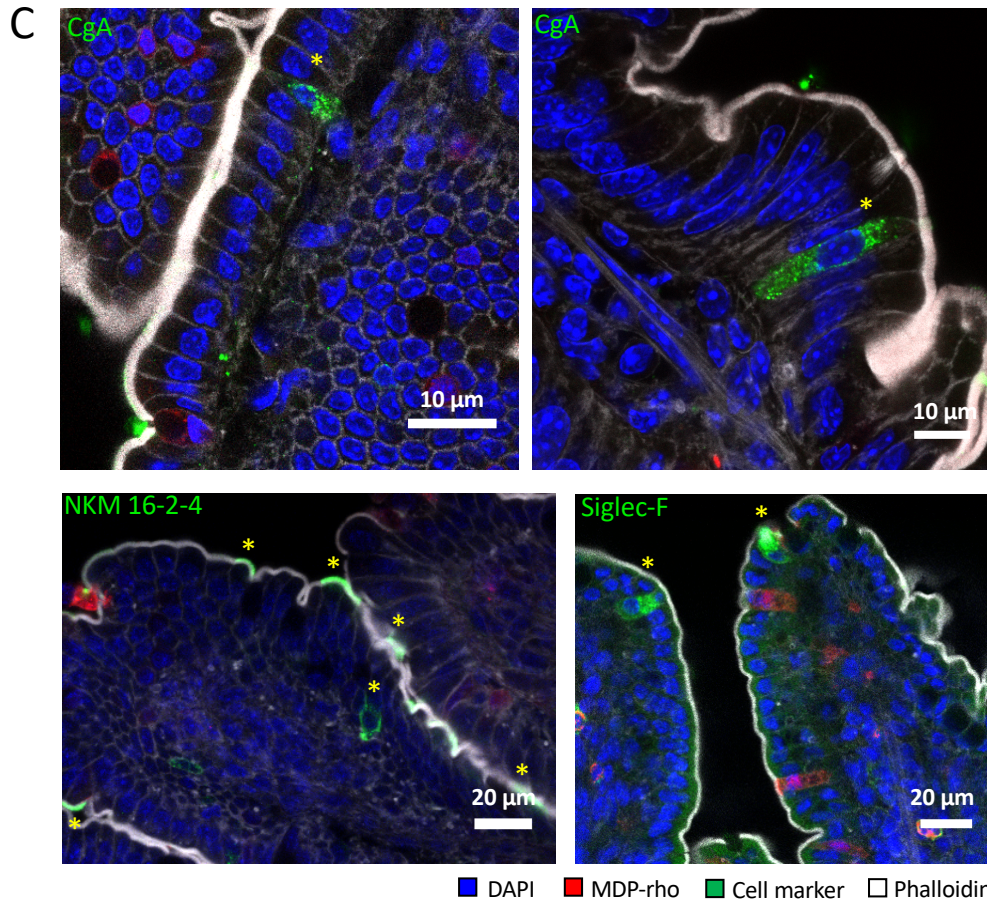

83

84 **Fig. S5. Cellular localization of fluorescently labelled peptidoglycan in the mouse ileal**  
 85 **epithelium.** A) Internalization of peptidoglycan-AF647 conjugate (Fluo-PGN) in the ileum of SPF  
 86 mice by a subset of epithelial cells. B) Fluo-PGN internalized in villus epithelial cells largely  
 87 colocalizes with Wheat Germ Agglutinin (WGA) stained goblet cells C) MDP-rho uptake assessed  
 88 in enteroendocrine cells, M cells and tuft cells. No association with MDP-rho was observed for CgA<sup>+</sup>  
 89 enteroendocrine cells, NKM-16-4-2<sup>+</sup> M cells or Siglec-F<sup>+</sup> tuft cells (green staining), whereas MDP-  
 90 rho uptake is observed elsewhere in the same field. Yellow asterisks highlight antibody positive  
 91 cells in each panel.

92

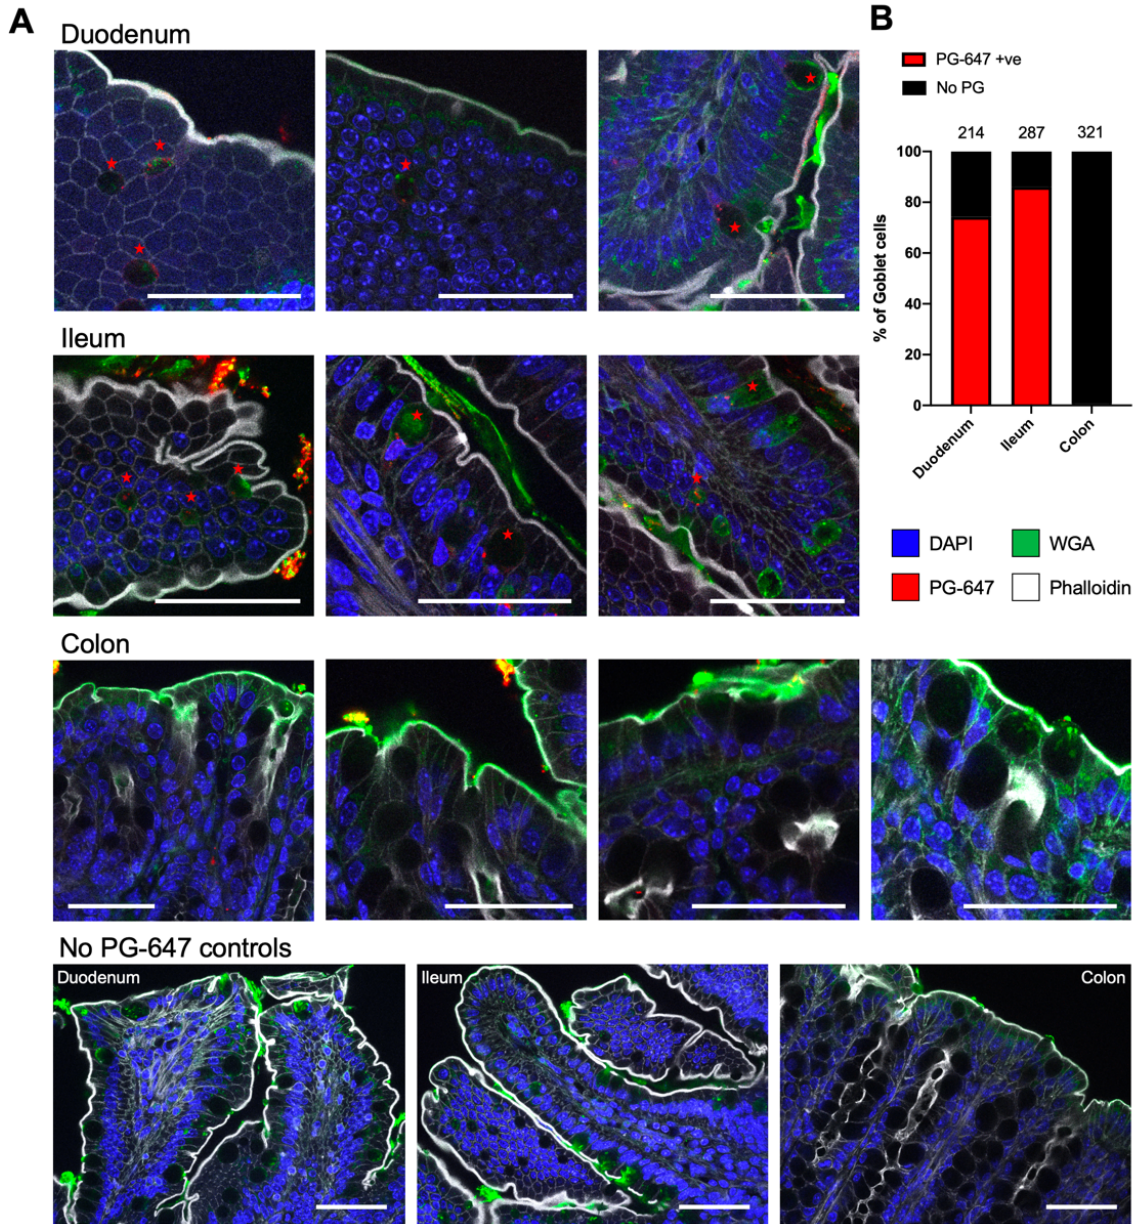

93  
 94  
 95  
 96  
 97  
 98  
 99  
 100  
 101  
 102  
 103

**Fig. S6. Uptake of peptidoglycan by goblet cells in different regions of the intestinal tract.**  
 A) Intestinal ligatures were prepared in the duodenum, ileum and colon of mice, and injected with *E. coli* peptidoglycan AlexaFluor 647 conjugate (PG-647; red), or PBS (No PG-647 controls; bottom row). Scale bars = 50  $\mu$ m. Counter staining is with DAPI (blue), Wheat-Germ Agglutinin Alexa Fluor 488 conjugate (WGA; green) and Phalloidin iFluor 555 conjugate (white). Red stars indicate goblet cells where internalized PG-647 is visible in the image. B) Percentage of goblet cells in each region displaying uptake or not of PG-647. For each region, the number above each bar indicates the number of goblet cells counted.

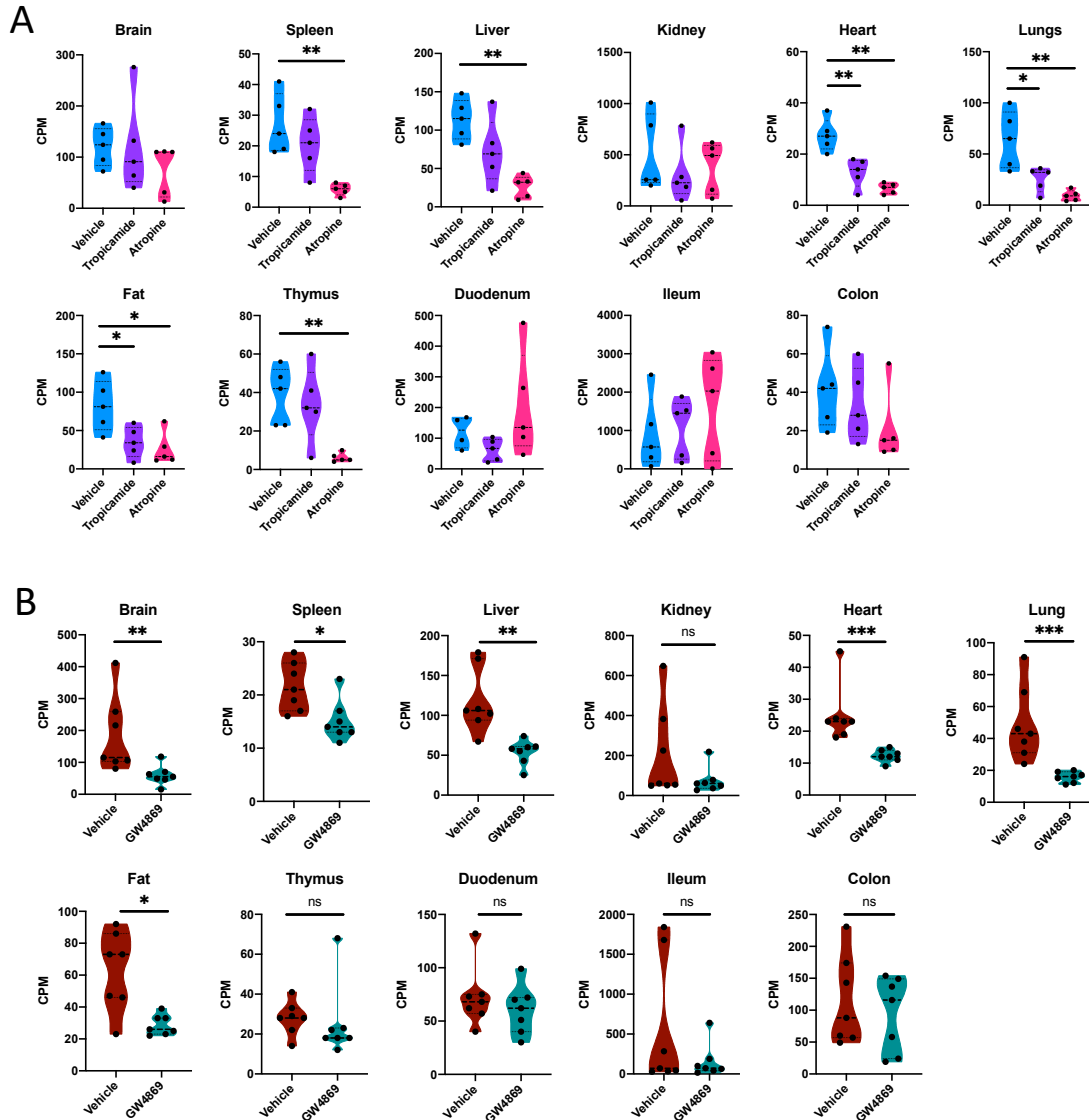

104

105 **Fig. S7. Regulation of the dissemination of [3H]-PGN across the gut.** A) Muscarinic receptor  
 106 antagonism suppresses the systemic biodistribution of [3H]-PGN without normalization. SPF mice  
 107 were administered tropicamide, atropine or vehicle control prior to gavage with [3H]-PGN.  
 108 Scintillation counting was performed on dissolved, decolorized organs. Results are presented as  
 109 CPM per whole organ, per tissue fragment (duodenum, ileum and colon). B) [3H]-PGN  
 110 biodistribution from the gut is suppressed by GW4869 treatment. Results are presented as CPM  
 111 per whole organ, per tissue fragment (duodenum, ileum and colon). Pairwise comparison to vehicle  
 112 control performed using the Mann–Whitney U test. \*  $P \leq 0.05$ ; \*\*  $P \leq 0.005$ .

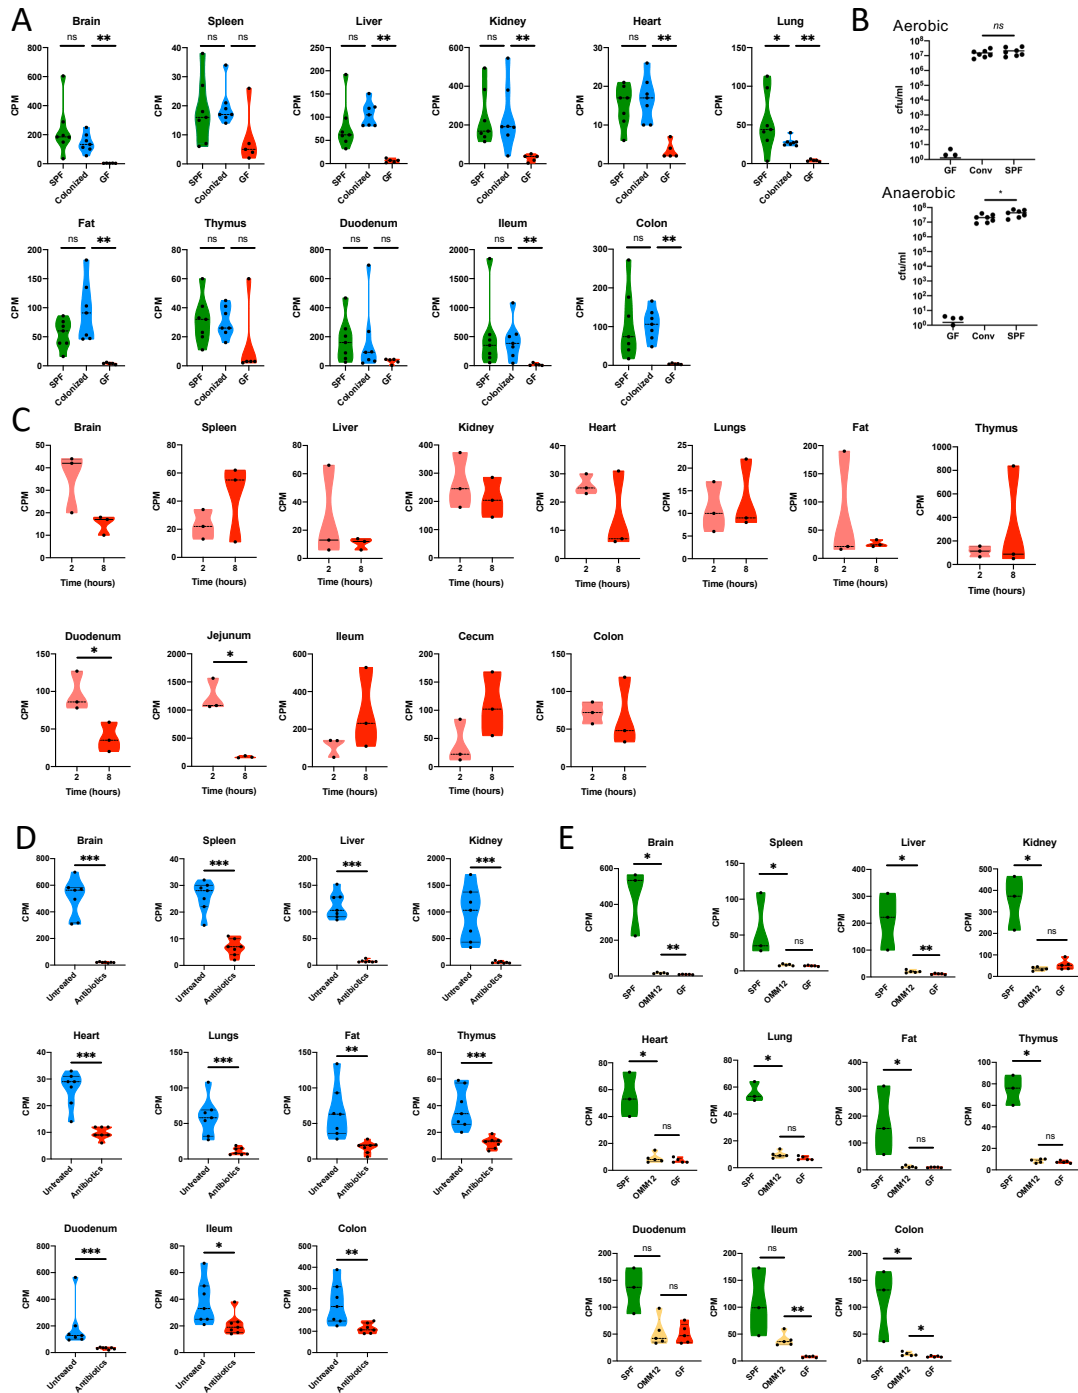

113

114 **Fig. S8. Dependency of [3H]-PGN biodistribution on microbial colonization status of the**  
 115 **host.** A) The biodistribution of [3H]-PGN in germ-free (GF) mice, specific pathogen free (SPF) mice  
 116 and conventionalized mice (previously GF mice co-housed with SPF for 3 weeks) presented as  
 117 CPM per whole organ, or per tissue fragment (duodenum, ileum, colon). B) Enumeration of  
 118 aerobically and anaerobically cultured fecal microbiota from germ-free, conventionalized and SPF  
 119 mice. Feces were collected immediately prior to gavage with [3H]-PGN. C) The biodistribution of  
 120 [3H]-PGN in germ-free mice 2h and 8h post gavage. D) Biodistribution of [3H]-PGN in SPF mice  
 121 treated with a broad-spectrum antibiotic cocktail. E) Biodistribution of [3H]-PGN in SPF mice,

122 OMM12 mice and GF mice presented as CPM per whole organ, or per tissue fragment (duodenum,  
123 ileum, colon). A, B, D and E) Pairwise comparisons performed using the Mann–Whitney U test. \*  
124  $P \leq 0.05$ ; \*\*  $P \leq 0.005$ ; \*\*\*  $P \leq 0.0005$ . C) Pairwise comparisons performed using Welch's t-test. \*  
125  $P \leq 0.05$ .

126  
127  
128  
129  
130  
131  
132  
133  
134  
135  
136  
137  
138  
139

**Table S1. Summary table of selected muropeptides detected from peptidoglycan of the mouse gut microbiota.** Muropeptide composition of the gut microbiota of four female C57BL/6J mice was assessed. A selection of 60 muropeptides were targeted, belonging to types A1 $\alpha$ , A1 $\gamma$  and A4 $\alpha$ , expected to be abundant among members of the gut microbiota.<sup>1</sup> Analysis was by LC-MS. For each muropeptide, the identity was confirmed by analysis of MS2 spectra. Muropeptides are grouped according to the characteristic diamino acid present at position 3 of the peptide stem, and color coded according to Fig. 1: blue, meso-diaminopimelic acid; green, amidated meso-diaminopimelic acid; red, lysine; white, muramyl dipeptide (no amino acid at position 3). G, N-acetyl-glucosamine; GlcN, N-deacetylated glucosamine; M, N-acetyl-muramitol (reduced form of N-acetyl-muramic acid); anhM, 1,6-anhydro-N-acetylmuramic acid; A, alanine; E, isoglutamate; Q, isoglutamine; mDap, meso-diaminopimelic acid; mDapNH<sub>2</sub>, amidated meso-diaminopimelic acid; K, lysine; N, asparagine; D, aspartic acid. Subscript Q indicates isoglutamine is presented instead of isoglutamate for muropeptides with mesoDAP or amidated mesoDAP at position 3 of the peptide stem.

| Muropeptide                                             | Plot Name (Fig. 1)   | Retention Time (min) | Formula        | Neutral Mass | m/z theoretical | m/z observed | z | error ppm |
|---------------------------------------------------------|----------------------|----------------------|----------------|--------------|-----------------|--------------|---|-----------|
| GM-AE                                                   | GM2                  | 8.91                 | C27H46N4O17    | 698.29       | 699.2931        | 699.2924     | 1 | -1.00     |
| GM-AQ                                                   | GM2 <sub>Q</sub>     | 7.11                 | C27H47N5O16    | 697.30       | 698.3091        | 698.3086     | 1 | -0.72     |
| GanhM-AE                                                | GanhM2               | 17.00                | C27H42N4O16    | 678.26       | 679.2669        | 679.2684     | 1 | 2.21      |
| GanhM-AQ                                                | GanhM2 <sub>Q</sub>  | 15.85                | C27H43N5O15    | 677.28       | 678.2828        | 678.2831     | 1 | 0.44      |
| GM-AEmDap                                               | GM3                  | 5.79                 | C34H58N6O20    | 870.37       | 436.1926        | 436.1925     | 2 | -0.23     |
| GM-AEmDap (deAc GlcN)                                   | GM3*                 | 4.05                 | C32H56N6O19    | 828.36       | 415.1864        | 415.1876     | 2 | 2.89      |
| GM-AQmDap                                               | GM3 <sub>Q</sub>     | 4.62                 | C34H59N7O19    | 869.39       | 435.7005        | 435.7013     | 2 | 1.84      |
| GM-AQmDap (deAc GlcN)                                   | GM3 <sub>Q</sub> *   | 3.10                 | C32H57N7O18    | 827.38       | 414.6952        | 414.6957     | 2 | 1.21      |
| GM-AEmDapA                                              | GM4                  | 9.47                 | C37H63N7O21    | 941.41       | 471.7111        | 471.7116     | 2 | 1.06      |
| GM-AEmDapA (deAc GlcN)                                  | GM4*                 | 7.90                 | C35H61N7O20    | 899.40       | 450.7059        | 450.7062     | 2 | 0.67      |
| GM-AQmDapA                                              | GM4 <sub>Q</sub>     | 8.46                 | C37H64N8O20    | 940.42       | 471.2191        | 471.2196     | 2 | 1.06      |
| GM-AQmDapA (deAc GlcN)                                  | GM4 <sub>Q</sub> *   | 6.00                 | C35H62N8O19    | 898.41       | 450.2138        | 450.2145     | 2 | 1.55      |
| GM-AEmDapAA                                             | GM5                  | 10.92                | C40H68N8O22    | 1012.44      | 507.2297        | 507.2307     | 2 | 1.97      |
| GanhM-AEmDap                                            | GanhM3               | 13.65                | C34H54N6O19    | 850.34       | 851.3515        | 851.3530     | 1 | 1.76      |
| GanhM-AEmDapA                                           | GanhM4               | 16.20                | C37H59N7O20    | 921.38       | 922.3888        | 922.3905     | 1 | 1.84      |
| GM-AEmDap - GM-AEmDap                                   | GM3-GM3              | 14.00                | C68H114N12O39  | 1722.73      | 862.3723        | 862.3750     | 2 | 3.13      |
| GM-AEmDap - GM-AEmDap (deAc GlcN 1x)                    | GM3-GM3*             | 13.12                | C66H112N12O38  | 1680.72      | 841.3673        | 841.3686     | 2 | 1.55      |
| GM-AEmDap - GM-AEmDapA                                  | GM3-GM4              | 14.80                | C71H119N13O40  | 1793.77      | 897.8911        | 897.8931     | 2 | 2.23      |
| GM-AEmDap - GM-AEmDapA (deAc GlcN 1x)                   | GM3-GM4*             | 14.00                | C69H117N13O39  | 1751.76      | 876.8867        | 876.8877     | 2 | 1.14      |
| GM-AQmDap - GM-AQmDapA                                  | GM3-GM4 <sub>Q</sub> | 14.05                | C71H121N15O38  | 1791.80      | 896.9071        | 896.9089     | 2 | 2.01      |
| GM-AEmDapA - GM-AEmDapA                                 | GM4-GM4              | 15.75                | C74H124N14O41  | 1864.80      | 933.4097        | 933.4116     | 2 | 2.04      |
| GM-AEmDapA - GM-AEmDapA (deAc GlcN 1x)                  | GM4-GM4*             | 14.80                | C72H122N14O40  | 1822.79      | 912.4059        | 912.4063     | 2 | 0.44      |
| GM-AQmDapA - GM-AQmDapA                                 | GM4-GM4 <sub>Q</sub> | 14.80                | C74H126N16O39  | 1862.84      | 932.4257        | 932.4271     | 2 | 1.50      |
| GM-AEmDapNH <sub>2</sub>                                | GM3                  | 5.00                 | C34H59N7O19    | 869.39       | 435.7006        | 435.7010     | 2 | 0.92      |
| GM-AEmDapNH <sub>2</sub> (deAc GlcN)                    | GM3*                 | 3.40                 | C32H57N7O18    | 827.38       | 414.6953        | 414.6958     | 2 | 1.21      |
| GM-AQmDapNH <sub>2</sub>                                | GM3 <sub>Q</sub>     | 4.00                 | C34H60N8O18    | 868.40       | 435.2086        | 435.2089     | 2 | 0.69      |
| GM-AQmDapNH <sub>2</sub> (deAc GlcN)                    | GM3 <sub>Q</sub> *   | 2.72                 | C32H58N8O17    | 826.39       | 414.2033        | 414.2035     | 2 | 0.48      |
| GM-AEmDapNH <sub>2</sub> A                              | GM4                  | -                    | C37H64N8O20    | 940.42       | 471.2191        | ND           | 2 | -         |
| GM-AEmDapNH <sub>2</sub> A (deAc GlcN)                  | GM4*                 | 7.20                 | C35H62N8O19    | 898.41       | 450.2138        | 450.2141     | 2 | 0.67      |
| GM-AQmDapNH <sub>2</sub> A                              | GM4 <sub>Q</sub>     | 8.00                 | C37H65N9O19    | 939.44       | 470.7271        | 470.7275     | 2 | 0.85      |
| GM-AQmDapNH <sub>2</sub> A deAc                         | GM4 <sub>Q</sub> *   | 4.40                 | C35H63N9O18    | 897.43       | 449.7218        | 449.7224     | 2 | 1.33      |
| GM-AEmDapNH <sub>2</sub> - GM-AEmDapNH <sub>2</sub> A   | GM3-GM4              | -                    | C71H121N15O38  | 1791.80      | 896.9071        | ND           | 2 | -         |
| GM-AQmDapNH <sub>2</sub> - GM-AQmDapNH <sub>2</sub> A   | GM3-GM4 <sub>Q</sub> | 12.50                | C71H123N17O36  | 1789.83      | 895.9231        | 895.9241     | 2 | 1.12      |
| GM-AEmDapNH <sub>2</sub> A - GM-AEmDapNH <sub>2</sub> A | GM4-GM4              | 14.50                | C74H126N16O39  | 1862.84      | 932.4257        | 932.4294     | 2 | 3.97      |
| GM-AQmDapNH <sub>2</sub> A - GM-AQmDapNH <sub>2</sub> A | GM4-GM4 <sub>Q</sub> | 13.50                | C74H128N18O37  | 1860.87      | 931.4417        | 931.4431     | 2 | 1.50      |
| GM-AQK                                                  | GM3                  | 5.62                 | C33H59N7O17    | 825.40       | 413.7056        | 413.7061     | 2 | 1.21      |
| GM-AQKN                                                 | GM3N                 | 10.15                | C37H65N9O19    | 939.44       | 470.7271        | 470.7279     | 2 | 1.70      |
| GM-AQKD                                                 | GM3D                 | 10.75                | C37H64N8O20    | 940.42       | 471.2191        | 471.2197     | 2 | 1.27      |
| GM-AQKA                                                 | GM4                  | 9.22                 | C36H64N8O18    | 896.43       | 449.2242        | 449.2246     | 2 | 0.89      |
| GM-AQKAN                                                | GM4N                 | 11.80                | C40H70N10O20   | 1010.48      | 506.2457        | 506.2465     | 2 | 1.58      |
| GM-AQKAD                                                | GM4D                 | 12.27                | C40H69N9O21    | 1011.46      | 506.7377        | 506.7386     | 2 | 1.78      |
| GM-AQKAA                                                | GM5                  | 10.33                | C39H69N9O19    | 967.47       | 484.7428        | 484.7433     | 2 | 1.03      |
| GM-AQKAAAN                                              | GM5N                 | 12.33                | C43H75N11O21   | 1081.51      | 541.7642        | 541.7650     | 2 | 1.48      |
| GM-AQKAAD                                               | GM5D                 | 12.85                | C43H74N10O22   | 1082.50      | 542.2562        | 542.2571     | 2 | 1.66      |
| GM-AQKN - GM-AQKA                                       | GM3N-GM4             | 15.11                | C73H127N17O36  | 1817.86      | 909.9388        | 909.9404     | 2 | 1.76      |
| GM-AQKN - GM-AQKAN                                      | GM3N-GM4N            | 16.31                | C77H133N19O38  | 1931.91      | 644.9759        | 644.9774     | 3 | 2.33      |
| GM-AQKN - GM-AQKAD                                      | GM3N-GM4D            | 16.84                | C77H132N18O39  | 1932.89      | 645.3039        | 645.3055     | 3 | 2.48      |
| GM-AQKAN - GM-AQKA                                      | GM4N-GM4             | 16.21                | C76H132N18O37  | 1888.90      | 945.4573        | 945.4595     | 2 | 2.33      |
| GM-AQKAN - GM-AQKAN                                     | GM4N-GM4N            | 17.42                | C80H138N20O39  | 2002.94      | 668.6549        | 668.6564     | 3 | 2.24      |
| GM-AQKAN - GM-AQKAD                                     | GM4N-GM4D            | 17.95                | C80H137N19O40  | 2003.93      | 668.9829        | 668.9844     | 3 | 2.24      |
| GM-AQKAAAN - GM-AQKA                                    | GM5N-GM4             | 16.50                | C79H137N19O38  | 1959.94      | 654.3197        | 654.3207     | 3 | 1.53      |
| GM-AQKAAAN - GM-AQKAN                                   | GM5N-GM4N            | 17.60                | C83H143N21O40  | 2073.98      | 692.3340        | 692.3355     | 3 | 2.17      |
| GM-AQKAAAN - GM-AQKAD                                   | GM5N-GM4D            | 18.20                | C83H142N20O41  | 2074.96      | 692.6620        | 692.6631     | 3 | 1.59      |
| GM-AQKAAAN - GM-AQKAD                                   | GM5D-GM4D            | 18.60                | C83H141N19O42  | 2075.95      | 692.9900        | 692.9919     | 3 | 2.74      |
| GM-AQKN - GM-AQKAN - GM-AQKAN                           | GM3N-GM4N-GM4N       | 19.40                | C117H201N29O57 | 2924.37      | 975.7980        | 975.7997     | 3 | 1.74      |
| GM-AQKN - GM-AQKAN - GM-AQKAD                           | GM3N-GM4N-GM4D       | 19.90                | C117H200N28O58 | 2925.36      | 976.1260        | 976.1285     | 3 | 2.56      |
| GM-AQKAN - GM-AQKAN - GM-AQKAN                          | GM4N-GM4N-GM4N       | 20.27                | C120H206N30O58 | 2995.41      | 999.4770        | 999.4789     | 3 | 1.90      |
| GM-AQKAN - GM-AQKAN - GM-AQKAD                          | GM4N-GM4N-GM4D       | 20.80                | C120H205N29O59 | 2996.39      | 999.8050        | 999.8082     | 3 | 3.20      |
| GM-AQKAAAN - GM-AQKAN - GM-AQKAN                        | GM5N-GM4N-GM4N       | 20.40                | C123H211N31O59 | 3066.45      | 1023.1560       | 1023.1588    | 3 | 2.74      |
| GM-AQKAAAN - GM-AQKAN - GM-AQKAD                        | GM5N-GM4N-GM4D       | 20.90                | C123H210N30O60 | 3067.43      | 1023.4841       | 1023.4871    | 3 | 2.93      |

140

141 **Supplementary Information References**

- 142 1. Schleifer, K. H. & Kandler, O. Peptidoglycan types of bacterial cell walls and their taxonomic  
143 implications. *Bacteriol. Rev.* 36, 407–477 (1972).
